# Supplementary material for: Dispersion of titanate nanotubes for nanomedicine: comparison of PEI and PEG nanohybrids
Source: Royal Society of Chemistry journal article supplement (doi:10.1039/c4dt02552k), 2014-11-04
Supplement: c4dt02552k1.pdf [file c4dt02552k1.pdf]

## Supplementary Information

### SI 1. PEI density of grafting

Theoretical calculation for 1:1 (w:w) ratio (w = 2mg):

Tube specific surface: 121 m<sup>2</sup>/g (measured by BET)

m PEI = m tube = 2 mg correspond to 2.42E+17 nm<sup>2</sup> (=121 m<sup>2</sup>/g \* 2 mg)

M PEI = 1,800 g/Mol

n PEI = 0.002/1,800 = 1.1111E-06 Mol

Number of PEI units = n PEI \* N<sub>Avogadro</sub> = 1.1111E-06\*6.02E+23 = 6.69E+17 PEI

Theoretical grafting density (PEI/nm<sup>2</sup>) = 6.69E+17/2.42E+17 = 2.76 PEI/nm<sup>2</sup>

Experimental density of grafting:

| TiONts:PEI<br>(w:w) | Theoretical<br>grafting density<br>(PEI/nm <sup>2</sup> ) | Experimental<br>binding<br>efficiency (%) | Experimental<br>grafting density<br>(PEI/nm <sup>2</sup> ) |
|---------------------|-----------------------------------------------------------|-------------------------------------------|------------------------------------------------------------|
| 1:0.01              | 0.03                                                      | 60.9                                      | 0.02                                                       |
| 1:0.05              | 0.14                                                      | 75.5                                      | 0.10                                                       |
| 1:0.1               | 0.28                                                      | 58.3                                      | 0.16                                                       |
| 1:0.3               | 0.83                                                      | 21.0                                      | 0.17                                                       |
| 1:0.5               | 1.38                                                      | 18.9                                      | 0.26                                                       |
| 1:1                 | 2.76                                                      | 15.2                                      | 0.42                                                       |
| 1:10                | 27.65                                                     | <u>nd</u>                                 | <u>nd</u>                                                  |

nd: not determined

### SI 2. PEG density of grafting

Theoretical calculation for TiONts-PEG<sub>2000</sub>:

The TiONts:PEG ratio used for the functionalization was 1:30 (w:w).

Tube specific surface: 121 m<sup>2</sup>/g (measured by BET)

m tube = 1 mg correspond to 1.21E+17 nm<sup>2</sup>

M PEG = 2000 g/Mol

n PEG = 0.03/2000 = 1.5E-05 Mol

Number of PEG units = n PEG \* N<sub>Avogadro</sub> = 1.5E-05\*6.02E+23 = 9.03E+18 PEG

Theoretical grafting density (PEG/nm<sup>2</sup>) = 9.03E+18/1.21E+17 = 7.47E+01 PEG/nm<sup>2</sup>

Experimental density of grafting for TiONts-PEG<sub>2000</sub>:

The mass percentage, due to PEG decomposition, between 125°C and 650°C was 17.2%.

$$\begin{aligned} N_{PEG} &= \frac{(\Delta m_{exp}) \cdot N_A}{M_{PEG} \cdot S_{BET} \cdot 10^{18}} \\ \text{Number of PEG units} &= \\ &= 17.2 \cdot 6.02E+23 / (2000 \cdot 121 E+18) = 0.43 \text{ PEG/nm}^2 \end{aligned}$$

**SI 3. SEM images of (a-b) bare titanate nanotubes, (c-d) TiONts/Si-mPEG<sub>2000</sub> nanohybrids, (e-f) TiONts/PEI<sub>1800</sub> (1:1, w:w) nanohybrids.**

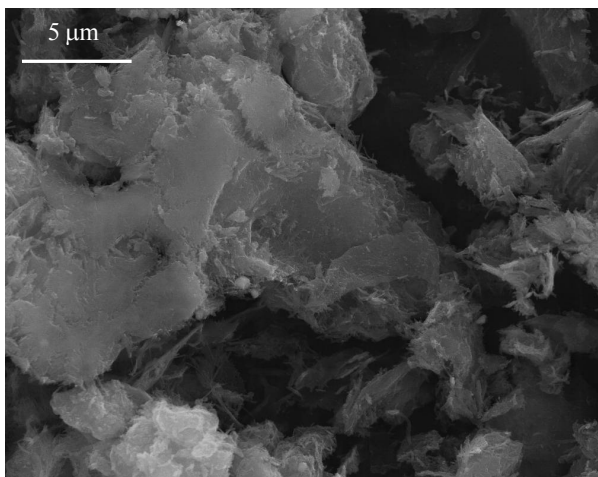

(a)

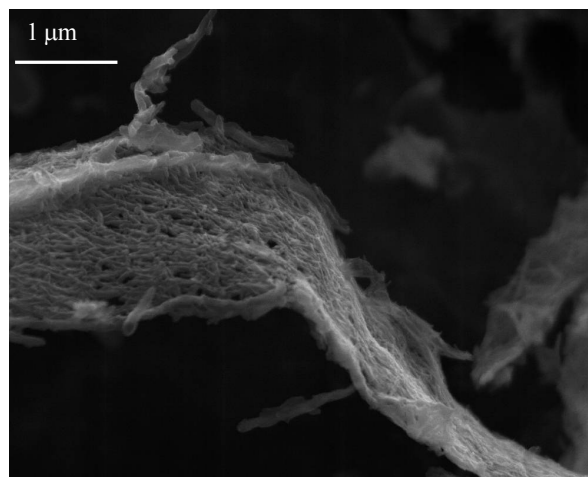

(b)

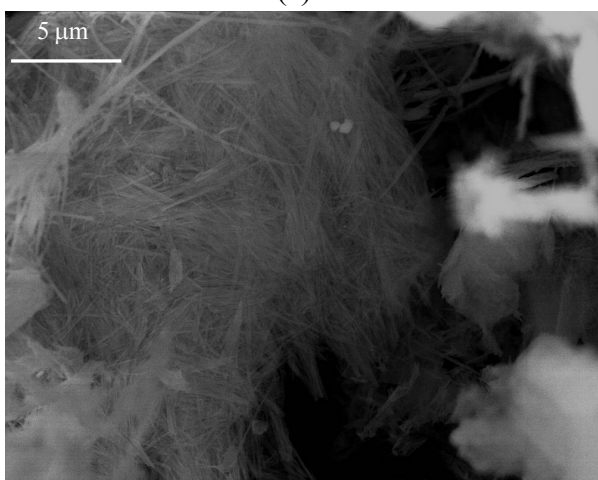

(c)

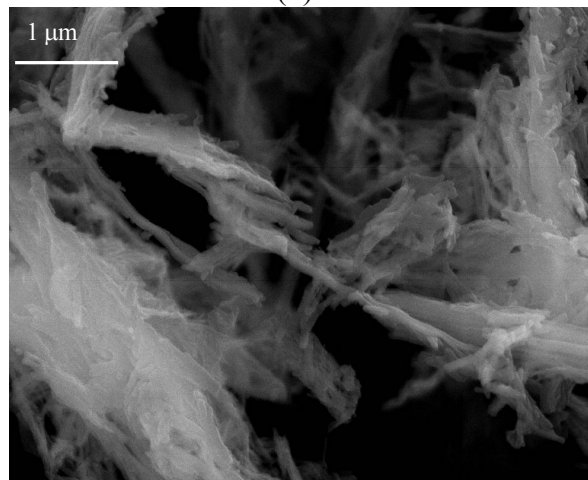

(d)

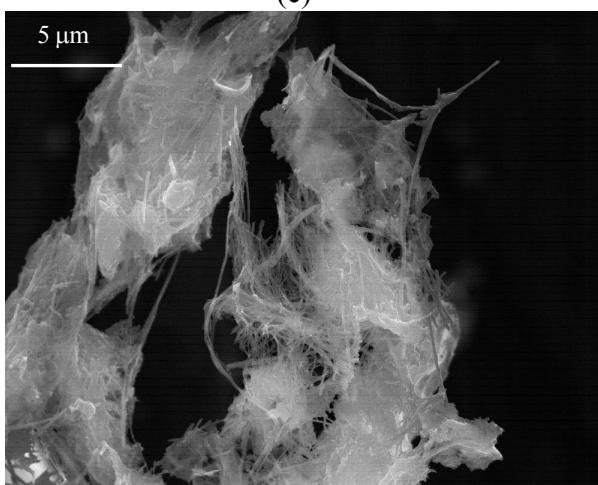

(e)

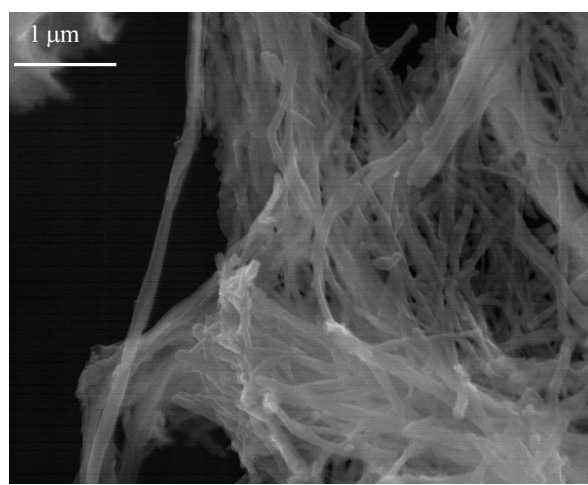

(f)
